# Supplementary material
Source: PubMed Central journal article supplement (PMC5669362)
Supplement: NIHMS749493-supplement-Supplementary_Material.pdf [file NIHMS749493-supplement-Supplementary_Material.pdf]

## Supplementary Materials for

### **Pronounced species divergence in corticospinal tract reorganization and functional recovery after lateralized spinal cord injury favors primates**

Lucia Friedli, Ephron S. Rosenzweig, Quentin Barraud, Martin Schubert, Nadia Dominici, Lea Awai, Jessica L. Nielson, Pavel Musienko, Yvette Nout-Lomas, Hui Zhong, Sharon Zdunowski, Roland R. Roy, Sarah C. Strand, Rubia van den Brand, Leif A. Havton, Michael S. Beattie, Jacqueline C. Bresnahan, Erwan Bézard, Jocelyne Bloch, V. Reggie Edgerton, Adam R. Ferguson, Armin Curt, Mark H. Tuszynski, Grégoire Courtine\*

\*Corresponding author. E-mail: [gregoire.courtine@epfl.ch](mailto:gregoire.courtine@epfl.ch)

Published 26 August 2015, *Sci. Transl. Med.* **7**, 302ra134 (2015)  
DOI: 10.1126/scitranslmed.aac5811

#### **This PDF file includes:**

##### Materials and Methods

Fig. S1. Clinical cases and experimental models of Brown-Séquard syndrome.

Fig. S2. Kinematics analysis uncovers similar patterns of locomotor deficits and compensation across species.

Fig. S3. Humans and monkeys, but not rats, recover hand kinematics and muscle activation patterns.

Fig. S4. Spinal cord decussating corticospinal fibers below the injury establishes synaptic contacts with neurons projecting to lumbar segments in monkeys.

Fig. S5. Increased density of corticospinal fibers above the hemisection in both rats and monkeys.

Fig. S6. Increased density of corticospinal tract fibers originating from the ipsilesional motor cortex fibers in segments below the hemisection in both rats and monkeys.

Fig. S7. Density of 5-hydroxytryptamine fibers below the hemisection remains unchanged in both monkeys and rats.

Fig. S8. The motor cortex fails to regain access to motoneurons below the hemisection in rats.

Table S1. Computed gait parameters.

Legends for movies S1 and S2

#### **Other Supplementary Material for this manuscript includes the following:**

(available at

[www.sciencetranslationalmedicine.org/cgi/content/full/7/302/302ra134/DC1](http://www.sciencetranslationalmedicine.org/cgi/content/full/7/302/302ra134/DC1))

Movie S1 (.mp4 format). Recovery of locomotion in monkeys and humans compared to rats after a lateral hemisection of the spinal cord.

Movie S2 (.mp4 format). Recovery of hand function in monkeys and humans compared to rats after a lateral hemisection of the spinal cord.

## MATERIALS AND METHODS

### EMSCI database

Recovery of upper and lower limb function was analyzed in a total of 437 individuals who suffered a cervical SCI. All individuals were included in the EMSCI database ([www.emsci.org](http://www.emsci.org)). For each subject, we computed a laterality index that quantified the extent of asymmetry in functional deficits at 2 weeks post-SCI. This index was derived from the international standards for neurological classification of spinal cord injury (ISNCSCI), which combine both sensory (pinprick and touch) and motoric (motor score) evaluations. Pinprick scores, which primarily evaluate the integrity of the spinally decussating spinothalamic tract, contributed to the contralateral sensory score. Motor scores were calculated for each limb and side as the combined ASIA motor scores of all the segments below the lesion. The segments C2 to T1 contributed to upper limb motor scores, while segments T2 and below contributed to lower limb motor scores. Sensory and motor scores were summed to generate a sensorimotor score for each limb and side. The laterality index was computed as the difference between left and right sensorimotor scores divided by their sum. Consequently, a value equal to 0 would correspond to perfectly symmetrical deficits and a value equal to 1 would correspond to a pure Brown-Séquard syndrome. Functional recovery was computed as the relative increase in sensorimotor scores for each limb and side at 6 or 12 months compared to evaluations carried out at 2 weeks post-SCI.

### EMSCI institutional members

#### *Initiator and leading center*

- [Uniklinik Balgrist](#), Zentrum für Paraplegie, Zürich (Switzerland)

#### *Founding members*

- [Klinik für Paraplegiologie, Universitätsklinikum Heidelberg](#), Heidelberg (Germany)
- [Klinikum Bayreuth](#), Bayreuth (Germany)
- [UMC St. Radboud](#), Nijmegen (The Netherlands)

#### *Active members*

- [RKU - Universitäts- und Rehabilitationskliniken Ulm](#), Ulm (Germany)
- [BG Kliniken Bergmannstrost Halle](#), Halle (Germany)
- [Institut Guttmann](#), Barcelona (Spain)
- [SRH Klinikum Karlsbad-Langensteinbach](#), Karlsbad (Germany)
- [BG Unfallklinik Murnau](#), Murnau (Germany)
- [Werner-Wicker-Klinik](#), Bad Wildungen (Germany)
- [Motol Hospital](#), Prague (Czech Republic)
- [Orthopädische Klinik Hessisch Lichtenau](#), Hessisch-Lichtenau (Germany)
- [Hospital Nacional de Paraplégicos](#), Toledo (Spain)
- [Schweizer Paraplegiker-Zentrum](#), Nottwil (Switzerland)
- [The Queen Elizabeth National Spinal Injury Unit](#), Glasgow (Scotland)
- [Ospedale Fondazione Santa Lucia](#), Rome (Italy)

*Passive members*

- [BG Universitätsklinikum Bergmannsheil](#), Bochum (Germany)
- [Clinique romande de réadaptation](#), Sion (Switzerland)
- [BG Unfallklinik Tübingen](#), Tübingen (Germany)
- [BG Unfallklinik Frankfurt am Main](#), Frankfurt a.M. (Germany)
- [BG Unfallkrankenhaus Hamburg](#), Hamburg (Germany)
- [Hôpital Raymond-Poincaré](#), Garches/Paris (France) (Founding Member)

*Associated members*

- [Charité, Department of Experimental Neurology](#), Berlin (Germany)
- [ICORD](#) (International Collaboration on Repair Discoveries), Vancouver (Canada)

## **EMG electrodes**

All surgical procedures used have been described previously (5). Under aseptic conditions and general anesthesia (1-2.5% Attane Isoflurane, Piramal Healthcare Limited, Mumbai, India), both rats and monkeys were implanted with bipolar intramuscular EMG electrodes (AS632, Cooner Wire) into selected hindlimb and forelimb muscles. In subsets of rats and monkeys, the following muscles were implanted: soleus and tibialis anterior for both hindlimbs; the biceps brachii, triceps brachii, extensor digitorum communis and flexor digitorum profundis of the ipsilesional forelimb. The ipsilesional flexor pollicis brevis also was implanted in monkeys. The proper location of EMG electrodes was verified post-mortem. The electrodes were connected to a head-mounted connector in rats, and an implanted telemetry recording system in monkeys (Konigsberg Instruments). Analgesia and antibiotics were provided post-surgically under monitoring of certified veterinaries.

After completion of pre-injury recordings, a second surgery was performed. A partial laminectomy followed by a lateral hemisection was made at the C7 spinal segment. In both rats and monkeys, a surgical micro-knife was mounted on a stereotaxic arm, positioned at the spinal midline and midway between the C5 and C6 dorsal laminae. This rostrocaudal position corresponds to the C7 spinal segment, as previously described (5). A micro-scissor was used several times to cut all the entire grey and white matters lateral to the inserted micro-knife. Two monkeys received the lateral hemisection using the same technique but at T10 spinal segment. The segment containing the lesion was reconstructed by a continuous series of Nissl stained sections. The lesion area was delimited for each section, and the area of maximum damage projected into a plane to obtain a lesion reconstruction (fig. S1, D and E).

## **Cortical electrodes**

A subset of rats ( $n = 8$ ) was implanted with an epidural monopolar electrode over the hindlimb area of the contralesional motor cortex to deliver stimulation. A reference electrode was positioned near the shoulder girdle (13).

## **Gait data analysis**

For the ladder, 20-step cycles were extracted for analysis. Additional parameters related to the positioning of the foot (or paw) with respect to the successive rungs of the ladder were calculated to assess the precision of foot (or paw) placement during gait. A PC analysis was applied on all computed parameters with two objectives: (i) to assess the degree of locomotor recovery compared to pre-lesion or healthy subjects, and (ii) to extract, for each limb and species, the most relevant parameters to account for lesion-induced changes in ipsilesional and contralesional leg movements. For each species, all computed parameters were mean-centered and variance-scaled to obtain dimensionless values ranging from -1 to 1. PC analysis was applied on the normalized parameters for each species and for all species combined. Average scores for each limb and condition were extracted and the relative degree of functional recovery was measured as the 3-D distance between pre- and post-lesion (early and chronic) data points in the space created by PC1-3. Parameters with high factor loadings ( $|\text{value}| > 0.5$ ) on PC1 and PC2 were extracted and regrouped into functional clusters.

### **Kinematics and electromyographic recordings**

Reflective markers were attached to the shaved skin of rats and humans overlying leg or arm landmarks for locomotion and hand function assessment, respectively. Reflective painting was used for monkeys. The landmarks for the legs were the iliac crest, greater trochanter, knee joint, malleolus, fifth metatarsal, and outside tip of the fifth or fourth digit. The landmarks for the arm were the anterior border of the scapula, head of the humerus, elbow joint, distal head of the ulna, metacarpo-phalangeal joint, and outside tip of the third digit. The body was modeled as an interconnected chain of rigid segments, and joint angles were generated accordingly. In humans, bipolar surface electrodes (1 cm diameter, electrode separation of 1 cm) connected to a wireless transmitter (Myon) were placed over leg (medial gastrocnemius, soleus, tibialis anterior) and arm (biceps brachii, triceps brachii, extensor digitorum communis and flexor digitorum superficialis) muscles during locomotor and hand function assessments, respectively. A ground electrode was placed on the wrist. In all the species, signals were sampled at 2 kHz, amplified, band-pass filtered (10-1000 Hz), stored, and synchronized on-line (Vicon Nexus) or off-line (SIMI) for kinematics analysis.

### **Anterograde tracing**

Rats and monkeys underwent anterograde tracing of corticospinal projections from both left and right motor cortex using tracers. All animals were anesthetized deeply as described above. In monkeys biotinylated dextran amine (BDA; 10% solution in water; 10,000 Da; Molecular Probes) was injected at 150 nl/site into 127 sites spanning the arm, trunk, and leg regions of the right motor cortex. Dextran-conjugated Alexa488 (D-A488) was injected using the same methods into the corresponding coordinates in the left motor cortex. The two monkeys with thoracic hemisection also received unilateral infusion of the retrograde tract tracing Fastblue (2% in 0.1-M phosphate buffer and 2% DMSO, EMS-CHEMIE) into the L2-L3 spinal segments. A total of 2.1 µl was pressure-injected over 7 sites (depth, 4.0 mm; space between injections, 1 mm). Seven weeks later, the monkeys were anesthetized deeply and perfused transcardially with a 4% solution of paraformaldehyde.

For rats, BDA (10% solution in H<sub>2</sub>O; 10,000 molecular weight) was injected at 500 nl /site into 10 sites spanning the forelimb, trunk, and hindlimb regions of the right or left motor cortex. Three weeks later, rats were anesthetized by an intraperitoneal injection of 0.5 ml sodium pentobarbital (50 mg/ml) and perfused transcardially with approximately 80 ml Ringer's solution containing 100,000 IU/l heparin (Roche) and 0.25% NaNO<sub>2</sub> followed by 300 ml of cold 4% phosphate-buffered paraformaldehyde, pH 7.4, containing 5% sucrose.

Our standard protocols were used to detect traced corticospinal fibers and 5-HT fibers using goat anti-5-HT antibodies for monkeys (Immunostar; 1:10,000 in TBS-X) and rabbit anti-5-HT antibodies for rats (Sigma Aldrich; 1:5000 in blocking solution containing 4% NGS) (13). Traced corticospinal fibers were co-labeled with the synaptic protein synaptophysin using mouse anti-synaptophysin antibodies (Millipore; 1:1000 in blocking solution containing 4% NGS) or the vesicular transporter of glutamate (vGlut1) using guinea pig anti-vGlut1 antibodies (Millipore; 1:2000 in blocking solution containing 2% NGS).

### **Tissue processing**

The spinal cord dura was removed and the spinal cord was cut in the transverse plane into blocks, using the nerve roots as a guide for the spinal levels. The block containing the lesion was sectioned in the horizontal plane on a freezing microtome or a cryostat set at 30 µm intervals. Analogous blocks were obtained from the intact animals. Blocks containing segments C3-C6 and

C8-T2 were sectioned in the transverse plane on a freezing microtome or a cryostat set at 40  $\mu\text{m}$ . Cut tissue sections were stored at  $-20^{\circ}\text{C}$  for monkeys and at  $4^{\circ}\text{C}$  for rats in cryoprotectant (25% glycerin, 30% ethylene glycol in 0.5 M phosphate buffer). Lesion extent was assessed using a 30- $\mu\text{m}$ -thick horizontal section stained for Nissl substance. Transverse sections from the tissue blocks immediately rostral and caudal to the lesion block (segments C3-C4 and C8-T1) were selected for analysis of corticospinal tract and 5-HT fiber density. Our standard protocols were used to detect traced corticospinal fibers (5, 13) and 5-HT fibers using goat anti-5-HT antibodies for monkeys (Immunostar; 1:10,000 in TBS-X) and rabbit anti-5-HT antibodies for rats (Sigma Aldrich; 1:5000 in blocking solution containing 4% NGS).

### **Quantification of fiber density and axons**

The capture and adjustment of anatomical images for quantification were performed as described previously (5, 13). For corticospinal fiber density quantification of 3 sections for monkeys and 5 sections for rats were randomly selected per animal. The fiber density of the gray matter for each animal was obtained using confocal stacks acquired with standard imaging settings and analyzed using custom-written Matlab (MathWorks) scripts according to previously described methods (13). Additionally, the number of labeled axons crossing the spinal cord midline was counted manually in each section used for the fiber density analysis. For 5-HT quantification of monkey sections, Stereo Investigator was used to outline lateral motor pools under low magnification and generate optical fractionator sampling sites. With a 100x objective, intersections of 5-HT-labeled axons with the inclusion lines of these sampling sites were marked. For rats, the same regions were quantified using the same methods as described for corticospinal tract axons. Serial reconstructions of some CST axons were performed as described previously for both monkey and rat sections below the level of injury (5, 13). An investigator who was blind to experimental conditions performed all tissue evaluations.

### **Syndromic analysis**

To evaluate the effect of species on the integrated syndromic outcome after SCI (7), we used non-linear principal components analysis (NLPCA). This method uses a combination of optimal scaling and variance-maximization procedures to detect coherent patterns in data involving linear or non-linear relationships and across metrics with diverse scaling (categorical, ordinal, numeric)



(15). We performed separate NLPCA extractions for rat-monkey and rat-human data using variable subsets that allowed direct cross-species comparisons. Datasets from kinematics, food-retrieval success, and anatomical measures were manually curated and combined into a single large dataset for monkeys and rats. Treadmill and ladder locomotion kinematics and neurophysiological measures were combined from human and rat data. Bivariate correlation matrices were created for each combination of outcomes. Syndromic analysis was performed in SPSS Categories v. 19 to generate syndromic variables (PC1-2) specific to either rat-monkey or rat-human comparisons. PC1 is the shared variance (%) of all measures as they move together in a multivariate space with each measure loading (weighted arrows) onto PC1 based on their respective correlation to the entire syndrome (Fig. 7, B and C).

## SUPPLEMENTARY FIGURES

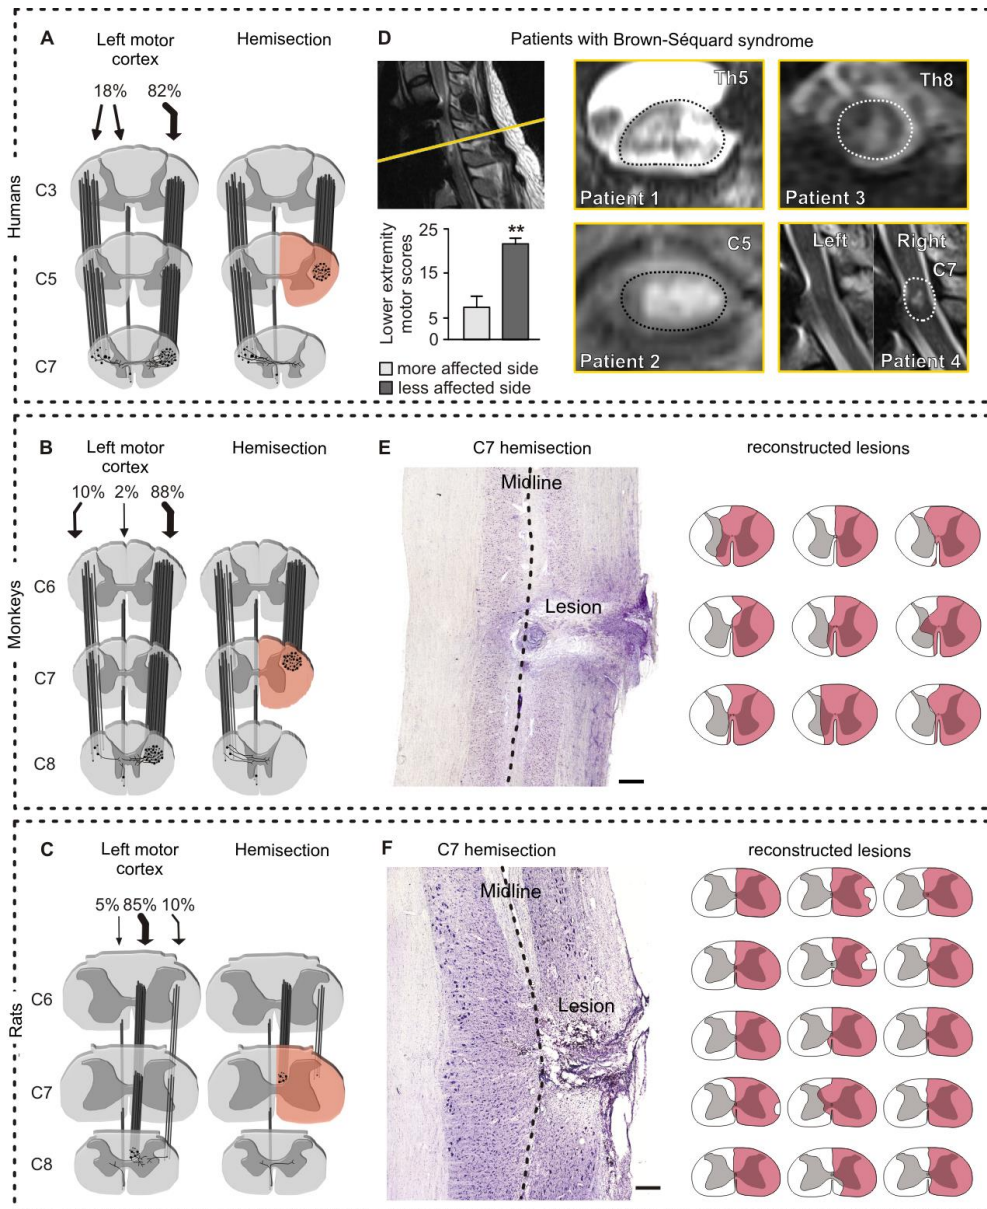

**Figure S1: Clinical cases and experimental models of Brown-Séquard syndrome.** (A to C) Schematic representation of corticospinal axonal projections in the spinal cord white and grey matter of humans, monkeys, and rats, respectively, before injury (healthy) and after a lateral hemisection. (D) MR images through the transverse plane obtained in the 4 SCI patients who participated in the longitudinal study. The level of the lesion is indicated in each MRI. Histograms show the mean values ( $\pm$  SEM) of lower extremity scores at early time-points after the lesion ( $n = 4$ )  $**P < 0.01$ , Friedman test. (E and F) Representative Nissl staining of a longitudinal section of the hemisected spinal cord in rats and monkeys. For each animal, the extent of the injured area was measured using camera lucida reconstructions. The surface of maximal damage per quarter of spinal cord was calculated to generate a measure of spared tissue. Scale bars: 1 mm for monkeys, 300  $\mu$ m for rats.

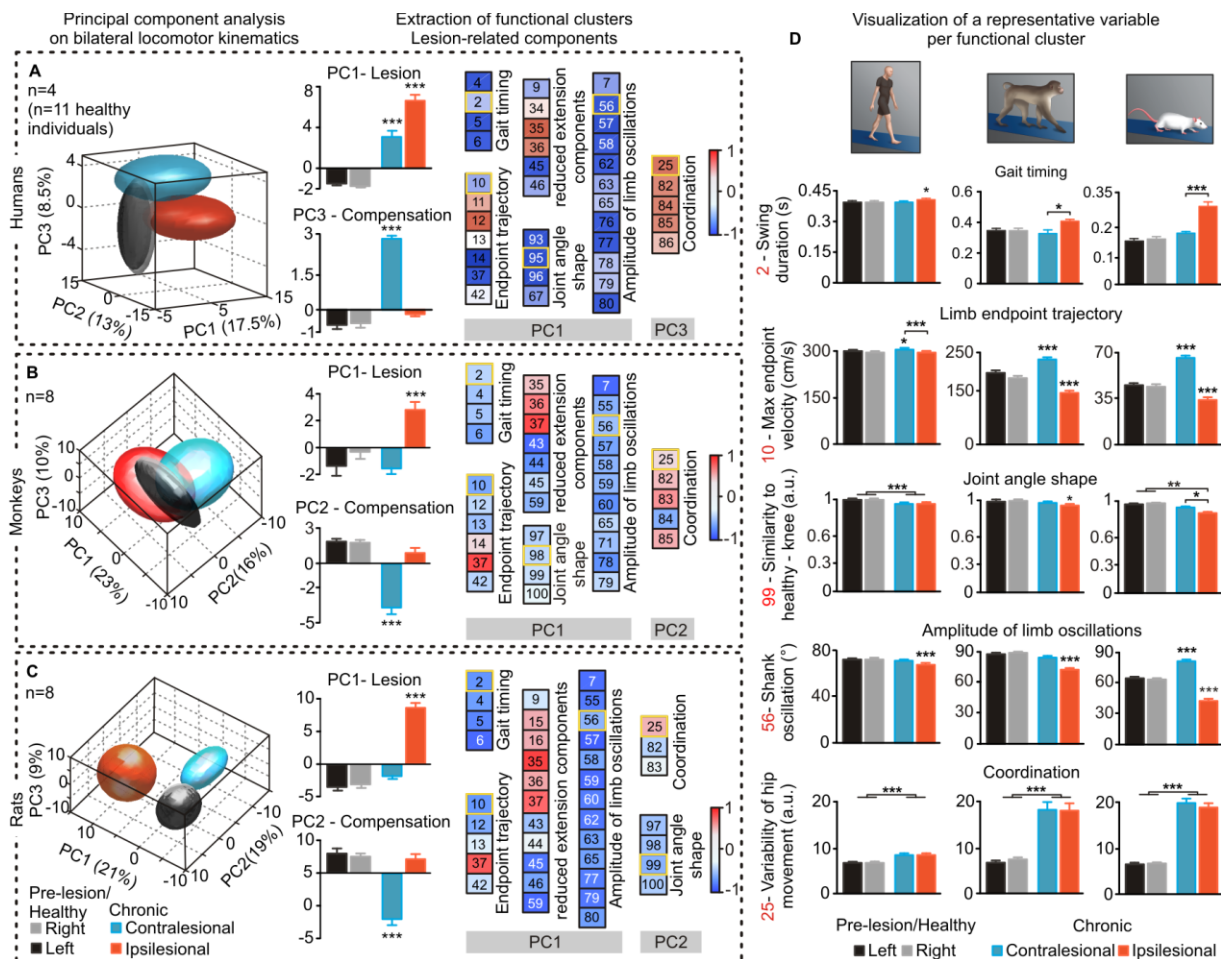

**Figure S2: Kinematics analysis uncovers similar patterns of locomotor deficits and compensation across species.** (A to C) PC analysis was applied on all the gait parameters measured for the left and right legs before the injury (or healthy), and at the chronic stage of the SCI. Gait clusters related to the left and right legs co-localized in non-injured humans (A), monkeys (B), and rats (C). In the chronic stage, gait clusters corresponding to the contralesional and ipsilesional legs moved in opposite directions, indicating side-specific alteration of gait patterns. Histograms show the mean values of scores for the left and right legs before the injury (or healthy) and at the chronic stage of the lesion. For each species, PC1 and PC2 distinguished the ipsilesional and contralesional legs, respectively. Correlations between parameters and PC1 and PC2, termed factor loadings, were extracted and regrouped into functional clusters that we named for clarity. The numbers refer to individual parameters that were calculated with the exact same methods in humans, monkeys, and rats (table S1). The same list of parameters loaded on PC1 and PC2 in humans, monkeys, and rats indicate that a lateral hemisection SCI induces similar deficits and compensation in all the studied species. (D) Gait parameters using more conventional representations: mean values of parameters with high factor loadings on PC1, which are framed in yellow in the functional clusters. \* $P < 0.05$ , \*\* $P < 0.01$ , \*\*\* $P < 0.001$ , ANOVA. Data are means  $\pm$  s.e.m. ( $n$  indicated in figure)

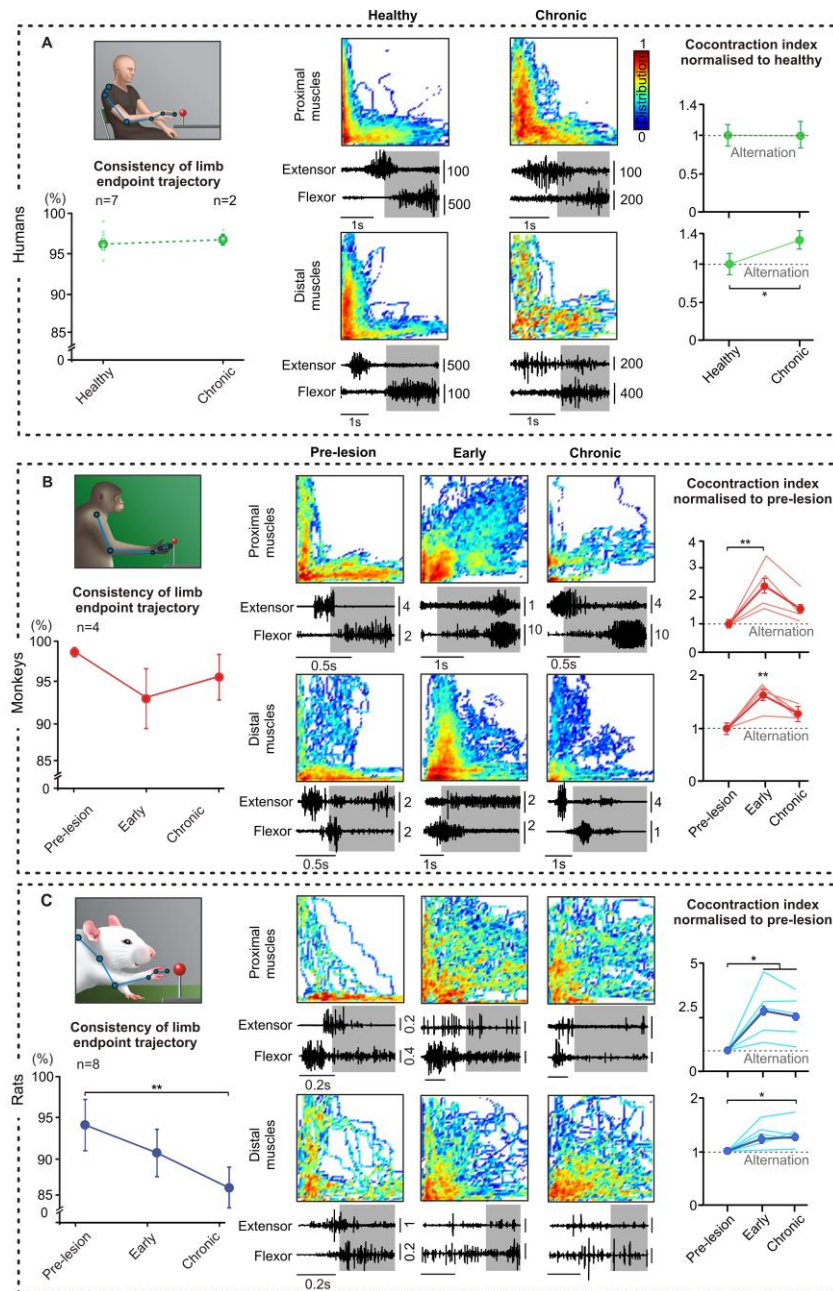

**Figure S3: Humans and monkeys, but not rats, recover hand kinematics and muscle activation patterns.** (A to C) The consistency of reaching movements was measured as the percent of explained variance by PC1 when applying a PC analysis on 10 successive 3D reaching trajectories. Representative examples of the recruitment pattern for proximal and distal pairs of antagonist muscles are shown during a reach and grasp. The empty and shaded areas correspond to the reach and grasp phases, respectively. The color-coded plots show, for each pair of antagonistic muscles, the probability of co-activation. An L-shaped pattern indicates reciprocal activation between antagonist muscles, while a filled pattern highlights a high degree of co-activation. Line plots showing the normalized values of the co-contraction index computed for proximal and distal antagonistic muscle pairs before the SCI (or healthy) and at the chronic stage. Thin lines correspond to individual data. \* $P < 0.05$ , \*\* $P < 0.01$ , ANOVA. Data are means  $\pm$  s.e.m. ( $n$  indicated in figure).

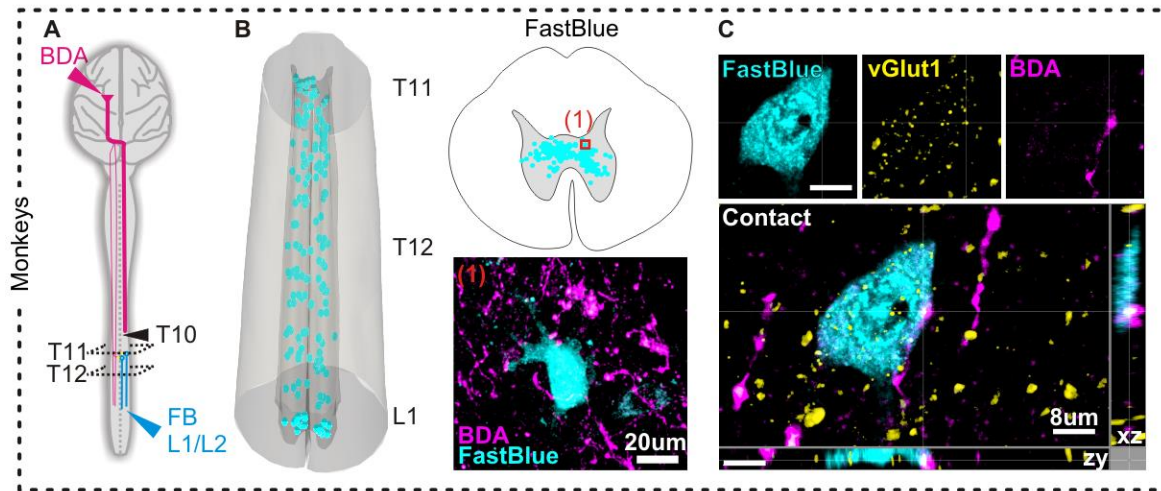

**Figure S4: Spinal cord decussating corticospinal fibers below the injury establishes synaptic contacts with neurons projecting to lumbar segments in monkeys.** (A) Diagram illustrating the anatomical experiments and analyzed regions. (B) Reconstruction of neurons retrogradely labeled from L1/L2 segments and a representative image of corticospinal fibers surrounding one of these neurons. The image was taken from the intermediate laminae of the T12 spinal segment, on the side of the hemisection. (C) Representative images ( $n = 2$  monkeys) showing 3D co-localization of BDA and vGlut1 synaptic terminals in close apposition to a neuron retrogradely labeled from L1/L2, which demonstrate the presence of synaptic terminals onto sub-lesional corticospinal fibers that contact intraspinal neurons.

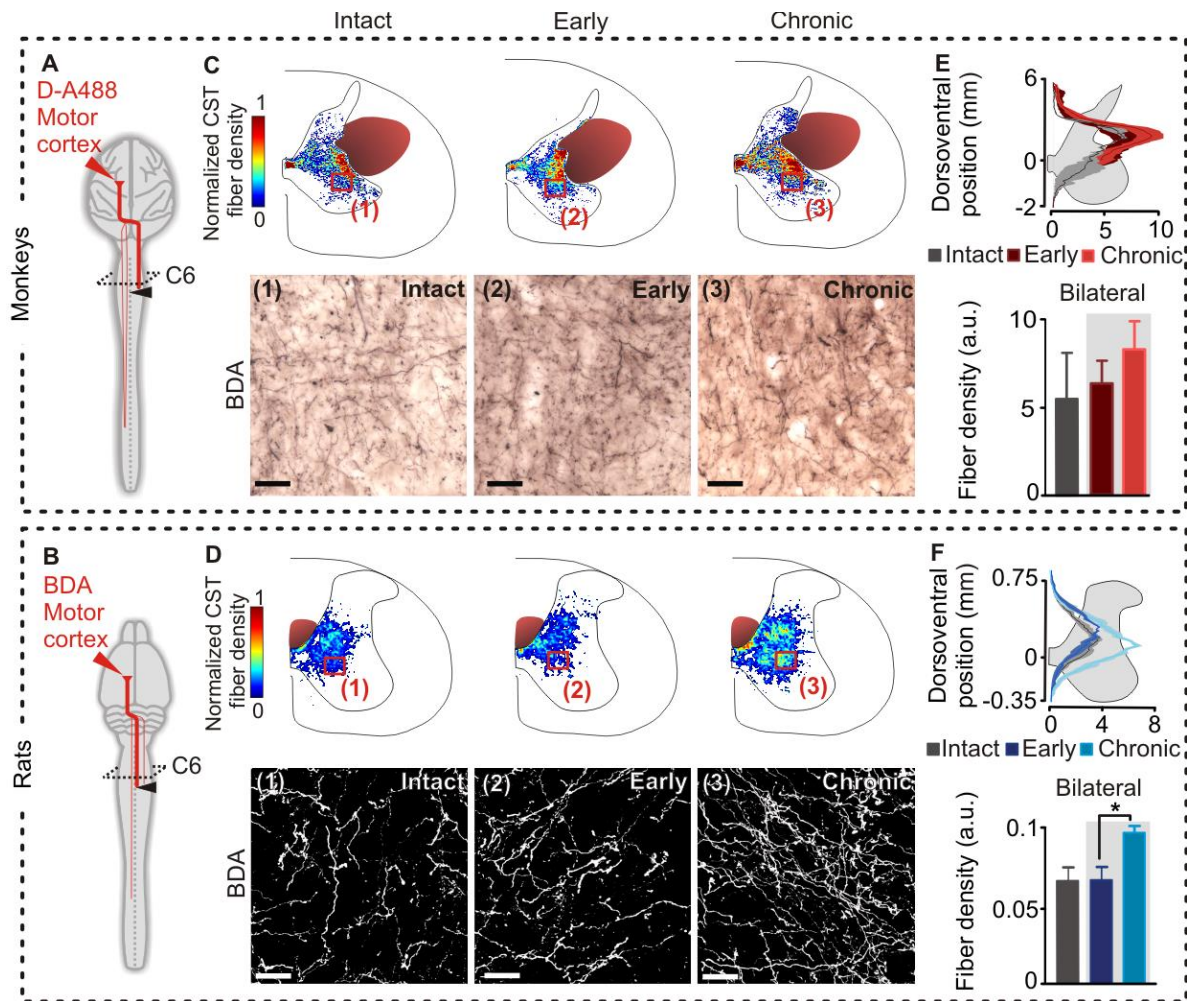

**Figure S5: Increased density of corticospinal fibers above the hemisection in both rats and monkeys.** (A and B) Diagrams illustrating the anatomical experiments and analyzed regions in monkeys and rats. (C and D) Heat maps of corticospinal tract fiber density in the ipsilesional C6 segment, together with representative photographs of corticospinal tract fibers from indicated regions in monkeys and rats. Scale bars, 100 and 30  $\mu\text{m}$  for monkeys and rats, respectively. (E and F) Corticospinal tract fiber density distribution and the averaged density of corticospinal tract fibers in the analyzed C6 segment. \* $P < 0.05$ , ANOVA. Data are means  $\pm$  s.e.m. ( $n = 7$  monkeys,  $n = 7$  rats for chronic subjects;  $n = 3$  monkeys,  $n = 8$  rats for early subjects).

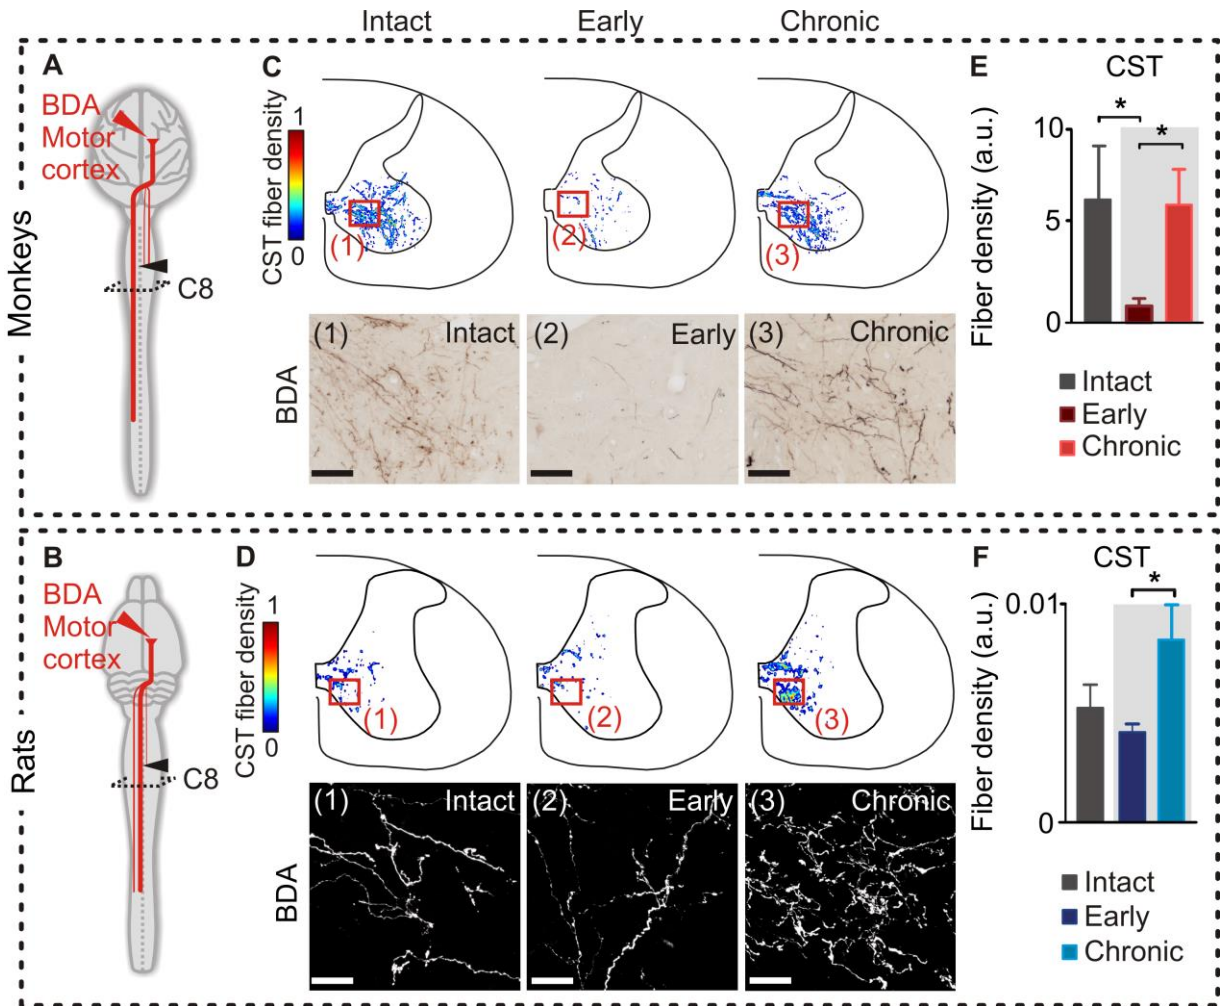

**Figure S6: Increased density of corticospinal tract fibers originating from the ipsilesional motor cortex fibers in segments below the hemisection in both rats and monkeys. (A and B)** Diagrams illustrating the anatomical experiments and analyzed regions in monkeys and rats. **(C and D)** Heat maps of corticospinal tract fiber density in the ipsilesional C8 segment, below the SCI, together with representative images of corticospinal tract fibers in monkeys and rats. Scale bars, 100  $\mu\text{m}$  for monkeys and 30  $\mu\text{m}$  for rats. **(E and F)** Average density ( $\pm$  SEM) of corticospinal tract fibers in the ipsilesional hemicord of the C8 segment.  $*P < 0.05$ , ANOVA. Data are means  $\pm$  s.e.m. ( $n = 7$  monkeys,  $n = 5$  rats for chronic subjects;  $n = 3$  monkeys,  $n = 7$  rats for early subjects).

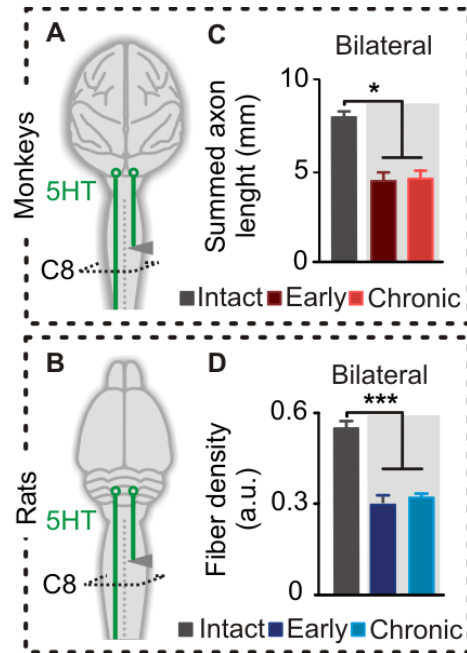

**Figure S7: Density of 5-hydroxytryptamine fibers below the hemisection remains unchanged in both monkeys and rats.** (A and B) Diagrams illustrating the anatomical experiments and analyzed regions in monkeys and rats. (C and D) Average density of 5-HT fibers in the analyzed C8 segment, below the hemisection. \* $P < 0.05$ , \*\*\* $P < 0.001$ , ANOVA. Data are means  $\pm$  s.e.m. ( $n = 7$  monkeys,  $n = 5$  rats for chronic subjects;  $n = 3$  monkeys,  $n = 8$  rats for early subjects).



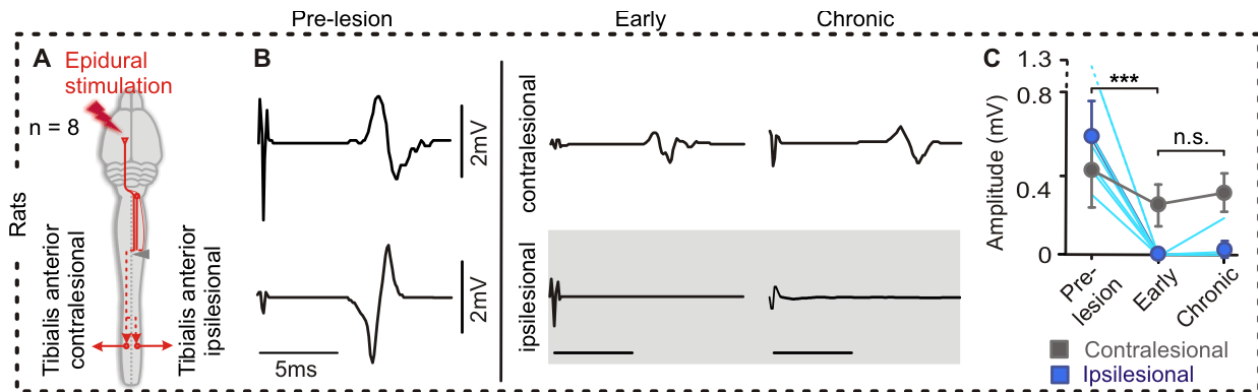

**Figure S8: The motor cortex fails to regain access to motoneurons below the hemisection in rats.** (A) Diagram illustrating the electrophysiological experiment including the stimulation and recording sites. All electrodes were implanted chronically. Stimulation was delivered under fully awake conditions, while the rat was standing quietly. (B) Motor responses were elicited by an electrical pulse (0.5 ms) delivered over the hindlimb area of the left motor cortex. Motor responses were recorded from left and right ankle flexor muscle before and at an early and chronic time-point after hemisection. (C) Mean values of motor response amplitudes recorded before, and at an early and chronic time-point after hemisection. Thin lines correspond to individual data. \*\*\* $P < 0.001$ , n.s., not significant, repeated-measure ANOVA. Data are means  $\pm$  s.e.m. ( $n = 8$  rats).

## SUPPLEMENTARY TABLE

**Table S1: Computed gait parameters.** The various parameters computed from kinematic recordings. The numbers refer to the variables in PC analysis.

| #                                                 | Computed parameters                                                  | #                                                             | Computed parameters                                                   |
|---------------------------------------------------|----------------------------------------------------------------------|---------------------------------------------------------------|-----------------------------------------------------------------------|
| <b>Gait timing</b>                                |                                                                      | <b>Joint angles and limb segment oscillations (continued)</b> |                                                                       |
| 1                                                 | Stance duration                                                      | 52                                                            | Whole limb adduction                                                  |
| 2                                                 | Swing duration                                                       | 53                                                            | Foot adduction                                                        |
| 3                                                 | Relative stance duration (percent of the cycle duration)             | 54                                                            | Hip joint angle                                                       |
| <b>Fore- and hindlimb coordination</b>            |                                                                      | 55                                                            | Knee joint angle                                                      |
| 4                                                 | Correlation between whole hindlimb oscillations                      | 56                                                            | Ankle joint angle                                                     |
| 5                                                 | Correlation between hindlimb and ipsilateral forelimb oscillations   | 57                                                            | MTP joint angle                                                       |
| 6                                                 | Correlation between hindlimb and contralateral forelimb oscillations | 58                                                            | Whole limb abduction                                                  |
| <b>Limb endpoint (MTP) trajectory</b>             |                                                                      | 59                                                            | Foot abduction                                                        |
| 7                                                 | Stride length                                                        | 60                                                            | Crest oscillations                                                    |
| 8                                                 | Step length                                                          | 61                                                            | Thigh oscillations                                                    |
| 9                                                 | 3D limb endpoint path length                                         | 62                                                            | Leg oscillations                                                      |
| 10                                                | Maximum backward position                                            | 63                                                            | Foot oscillations                                                     |
| 11                                                | Minimum forward position                                             | 64                                                            | Toe oscillations                                                      |
| 12                                                | Step height                                                          | 65                                                            | Whole limb oscillations                                               |
| 13                                                | Maximum speed during swing                                           | 66                                                            | Hip joint angle                                                       |
| 14                                                | Relative timing of maximum velocity during swing                     | 67                                                            | Knee joint angle                                                      |
| 15                                                | Acceleration at swing onset                                          | 68                                                            | Ankle joint angle                                                     |
| 16                                                | Endpoint velocity                                                    | 69                                                            | MTP joint angle                                                       |
| 17                                                | Orientation of the velocity vector at swing onset                    | 70                                                            | Whole limb medio-lateral oscillations                                 |
| 18                                                | Dragging                                                             | 71                                                            | Foot abduction /adduction                                             |
| 19                                                | Relative dragging duration (percent of swing duration)               | <b>Velocity</b>                                               |                                                                       |
| <b>Stability</b>                                  |                                                                      | 72                                                            | Whole limb oscillation velocity                                       |
| 20                                                | lateral movement of the foot during swing                            | 73                                                            | Hip joint angle velocity                                              |
| 21                                                | Stance width                                                         | 74                                                            | Knee joint angle velocity                                             |
| 22                                                | Maximum trunk vertical position                                      | 75                                                            | Ankle joint angle velocity                                            |
| 23                                                | Minimal trunk vertical position                                      | 76                                                            | MTP joint angle velocity                                              |
| 24                                                | Amplitude of the vertical trunk position                             | 77                                                            | Whole limb oscillation velocity                                       |
| 25                                                | Variability of sagittal trunk oscillations                           | 78                                                            | Hip joint angle velocity                                              |
| 26                                                | Variability in velocity of sagittal trunk oscillations               | 79                                                            | Knee joint angle velocity                                             |
| 27                                                | Variability of Medio-lateral hip oscillations                        | 80                                                            | Ankle joint angle velocity                                            |
| 28                                                | Variability of vertical mid-point hip oscillations                   | 81                                                            | MTP joint angle velocity                                              |
| 29                                                | Variability of Medio-lateral shoulder oscillations                   | 82                                                            | Whole limb angle velocity                                             |
| 30                                                | Variability of vertical mid-point shoulder oscillations              | 83                                                            | Hip joint angle velocity                                              |
| 31                                                | Variability of Medio-lateral shoulder rotations                      | 84                                                            | Knee joint angle velocity                                             |
| 32                                                | Variability of Medio-lateral hip rotations                           | 85                                                            | Ankle joint angle velocity                                            |
| 33                                                | Lateral oscillation of the center of mass                            | 86                                                            | MTP joint angle velocity                                              |
| 34                                                | Vertical oscillation of the center of mass                           | <b>Inter-limb coordination</b>                                |                                                                       |
| 35                                                | 3D oscillation of the center of mass                                 | 87                                                            | Degree of linear coupling between joint oscillations                  |
| <b>Joint angles and limb segment oscillations</b> |                                                                      | 88                                                            | Temporal coupling between crest and thigh oscillations                |
| 36                                                | Crest oscillations                                                   | 89                                                            | Temporal coupling between thigh and leg oscillations                  |
| 37                                                | Thigh oscillations                                                   | 90                                                            | Temporal coupling between leg and foot oscillations                   |
| 38                                                | Shank oscillations                                                   | 91                                                            | Temporal coupling between foot and toe oscillations                   |
| 39                                                | Foot oscillations                                                    | 92                                                            | Correlation between crest and thigh oscillations                      |
| 40                                                | Toe oscillations                                                     | 93                                                            | Correlation between thigh and leg oscillations                        |
| 41                                                | Whole limb oscillations                                              | 94                                                            | Correlation between leg and foot oscillations                         |
| 42                                                | Crest oscillations                                                   | 95                                                            | Correlation between foot and toe oscillations                         |
| 43                                                | Thigh oscillations                                                   | 96                                                            | Correlation between hip and knee oscillations                         |
| 44                                                | Shank oscillations                                                   | 97                                                            | Correlation between knee and ankle oscillations                       |
| 45                                                | Foot oscillations                                                    | 98                                                            | Correlation between ankle and MTP oscillations                        |
| 46                                                | Toe oscillations                                                     | <b>Similarity to healthy gait</b>                             |                                                                       |
| 47                                                | Whole limb oscillations                                              | 99                                                            | Correlation between limb oscillation of healthy and pathological leg  |
| 48                                                | Hip joint angle                                                      | 100                                                           | Correlation between hip oscillation of healthy and pathological leg   |
| 49                                                | Knee joint angle                                                     | 101                                                           | Correlation between knee oscillation of healthy and pathological leg  |
| 50                                                | Ankle joint angle                                                    | 102                                                           | Correlation between ankle oscillation of healthy and pathological leg |
| 51                                                | MTP joint angle                                                      | 103                                                           | Correlation between MTP oscillation of healthy and pathological leg   |

## **SUPPLEMENTARY MOVIES**

**Movie S1. Recovery of locomotion in monkeys and humans compared to rats after a lateral hemisection of the spinal cord.** This movie illustrates the recovery of basic and ladder locomotion after a lateral hemisection of the spinal cord in primates and rats.

**Movie S2. Recovery of hand function in monkeys and humans compared to rats after a lateral hemisection of the spinal cord.** This movie illustrates the recovery of manual skills after a lateral hemisection of the spinal cord in primates and rats.
